# Supplementary material
Source: PubMed Central journal article supplement (PMC9096014)
Supplement: sj-pdf-1-spr-10.1177_02654075211066922.pdf [file sj-pdf-1-spr-10.1177_02654075211066922.pdf]

**Divergent effects of social media use on meaning in life via loneliness and existential isolation during the coronavirus pandemic**

**Supplemental Materials**

Item 2 of the emotional loneliness scale (De Jong Gierveld & van Tillburg, 2006) was dropped in Studies 1 and 2 to improve scale reliability. Models utilizing each item separately was not possible because *PROCESS* (Hayes, 2012) mediation is unable to specify dichotomous variables as mediators. Thus, Tables S1-S3 report the specific paths and indirect effects for Study 1 and 2 analyses utilizing different combinations of emotional loneliness items. Results only differ in Study 1 (Table S1) such that all other combinations of emotional loneliness items lead to significant indirect effects from social media use to meaning in life. However, the utilized combination (items 1 and 3) resulted in the best internal reliability.

**Table S1**

*Specific pathways and indirect effect of social media use on meaning in life via emotional loneliness item combinations in Study 1*

| X             | EL items    | Y          | <i>a</i> -path<br>(SE) | <i>b</i> -path<br>(SE) | Ind. Effect<br>(SE) | 95% CI             |
|---------------|-------------|------------|------------------------|------------------------|---------------------|--------------------|
| <b>SM use</b> | <b>1, 3</b> | <b>MIL</b> | <b>.01 (.01)</b>       | <b>-.94 (.19)</b>      | <b>-.01 (.01)</b>   | <b>[-.04, .01]</b> |
| SM use        | 1, 2, 3     | MIL        | .02 (.01)              | -.94 (.21)             | -.02 (.01)          | [-.05, -.001]      |
| SM use        | 1, 2        | MIL        | .03 (.01)              | -.69 (.18)             | -.02 (.01)          | [-.05, -.003]      |
| SM use        | 2, 3        | MIL        | .03 (.01)              | -.69 (.20)             | -.02 (.01)          | [-.04, -.002]      |

Note: EL = emotional loneliness; MIL = meaning in life. Ind. Effect = indirect effect. Item combination 1 & 3 (bolded) was reported in manuscript. 95% CI refers to indirect effect. Other variables in model include state existential isolation, social loneliness, age, gender, if participants were in a state with active stay-at-home orders, and whether participants were following those orders.

**Table S2**

*Specific pathways and indirect effect of active social media use on meaning in life via emotional loneliness item combinations in Study 2*

| X                 | EL items    | Y          | <i>a</i> -path<br>(SE) | <i>b</i> -path<br>(SE) | Ind. Effect<br>(SE) | 95% CI              |
|-------------------|-------------|------------|------------------------|------------------------|---------------------|---------------------|
| <b>Active use</b> | <b>1, 3</b> | <b>MIL</b> | <b>.03 (.01)</b>       | <b>-.82 (.09)</b>      | <b>-.03 (.01)</b>   | <b>[-.04, -.02]</b> |
| Active use        | 1, 2, 3     | MIL        | .04 (.01)              | -.80 (.11)             | -.03 (.01)          | [-.05, -.02]        |
| Active use        | 1, 2        | MIL        | .03 (.01)              | -.46 (.11)             | -.02 (.01)          | [-.02, -.01]        |
| Active use        | 2, 3        | MIL        | .03 (.01)              | -.46 (.11)             | -.02 (.01)          | [-.03, -.01]        |

Note: EL = emotional loneliness; MIL = meaning in life. Ind. Effect = indirect effect. Item combination 1 & 3 (bolded) was reported in manuscript. 95% CI refers to indirect effect. Other variables in model include state existential isolation, social loneliness, age, gender, if participants were in a state with active stay-at-home orders, whether participants were following those orders, passive social media use, week of data collection.

**Table S3**

*Specific pathways and indirect effect of passive social media use on meaning in life via emotional loneliness item combinations in Study 2*

| X                  | EL items    | Y          | a-path (SE)      | b-path (SE)       | Ind. Effect (SE)  | 95% CI               |
|--------------------|-------------|------------|------------------|-------------------|-------------------|----------------------|
| <b>Passive use</b> | <b>1, 3</b> | <b>MIL</b> | <b>.02 (.01)</b> | <b>-.82 (.09)</b> | <b>-.02 (.01)</b> | <b>[-.03, -.001]</b> |
| Passive use        | 1, 2, 3     | MIL        | .02 (.01)        | -.80 (.11)        | -.01 (.01)        | [-.03, -.003]        |
| Passive use        | 1, 2        | MIL        | .02 (.01)        | -.58 (.10)        | -.01 (.01)        | [-.02, -.003]        |
| Passive use        | 2, 3        | MIL        | .01 (.01)        | -.46 (.11)        | -.01 (.004)       | [-.01, -.0001]       |

Note: EL = emotional loneliness; MIL = meaning in life. Ind. Effect = indirect effect. Item combination 1 & 3 (bolded) was reported in manuscript. 95% CI refers to indirect effect. Other variables in model include state existential isolation, social loneliness, age, gender, if participants were in a state with active stay-at-home orders, whether participants were following those orders, active social media use, week of data collection.
